# Supplementary material
Source: publisher site journal article supplement (https://www.kjim.org/upload/media/kjim-2018-329-suppl1.pdf)
Supplement: Supplementary file 1 [file kjim-2018-329-suppl1.pdf]

**Supplementary Table 1. Comparison of CP score between patients with HCC and those with LC but not HCC**

|                   | HCC (n = 11) | LC without HCC (n = 40) | p value |
|-------------------|--------------|-------------------------|---------|
| CP score          | 5.9 ± 1.3    | 5.4 ± 0.9               | 0.179   |
| CP A:B            | 10:1         | 35:5                    | 0.762   |
| SVR <sub>12</sub> | 8/11 (72.7)  | 36/40 (90)              | 0.146   |

Values are presented as mean ± SD or number/total number (%).

CP, Child-Pugh; HCC, hepatocellular carcinoma; LC, liver cirrhosis; SVR, sustained virological response.
